# Supplementary material for: Neuropeptide precursors and neuropeptides in the sea cucumber Apostichopus japonicus: a genomic, transcriptomic and proteomic analysis
Source: Springer Nature journal article supplement (doi:10.1038/s41598-019-45271-3), 2019-06-20

**Neuropeptide precursors and neuropeptides in the sea cucumber *Apostichopus japonicus*: a genomic, transcriptomic and proteomic analysis**

Muyan Chen<sup>1\*#</sup>, Alzbeta Talarovicova<sup>2#</sup>, Yingqiu Zheng<sup>1</sup>, Kenneth B. Storey<sup>3</sup>,  
Maurice R. Elphick<sup>2\*</sup>

1. *The Key Laboratory of Mariculture, Ministry of Education, Ocean University of China, Qingdao, PR China*
2. *School of Biological & Chemical Sciences, Queen Mary University of London, London E1 4NS, UK*
3. *Institute of Biochemistry, Carleton University, 1125 Colonel By Drive, Ottawa, ON, K1S 5B6, Canada*

**\* Correspondence:**

Prof. Muyan Chen: [chenmuyan@ouc.edu.cn](mailto:chenmuyan@ouc.edu.cn)

Prof. Maurice Elphick: [m.r.elphick@qmul.ac.uk](mailto:m.r.elphick@qmul.ac.uk)

# these authors contributed equally



**Supplementary Figure 1 Alignment of *Apostichopus japonicus* neuropeptides with related peptides in other taxa.** **A.** Vasopressin/oxytocin-type peptides, **B.** NG peptides, **C.** Gonadotropin-releasing hormone (GnRH)-type and corazonin (CRZ)-type peptides, **D.** Cholecystokinin (CCK)-type peptides, **E.** Thyrotropin-releasing hormone (TRH)-type peptides, **F.** Orexin (OX)-type peptides, **G.** LQ: Luquin (LQ)-type peptides, **H.** kisspeptin (KP)-type peptides, **I.** Somatostatin (SS)-type peptides, **J.** Calcitonin (CT)-type peptides, **K.** Pigment-dispersing factor (PDF)-type peptides, **L.** Pedal peptide-type peptides, **M.** Glycoprotein hormone alpha-2 (GPA2)-type peptides, **N.** Glycoprotein hormone beta-5 (GPB5)-type peptides, **O.** Bursicon alpha-type (BALP)-type peptides, **P.** Bursicon beta (BBLP)-type peptides, **Q.** Insulin-like peptide A chain (ILPA)-type peptides, **R.** Insulin-like peptide B chain (ILPB)-type peptides, **S.** L-type SALMFamide peptides, **T.** F-type SALMFamide peptides, **U.** AN peptides, **V.** Ajn9 and Spn9, **W.** Ajn11, Spn11 and Arn11, **X.** Ajn15, Spn15, Arn15a and Arn15b, **Y.** Ajn18, Spn18, Arn18, **Z.** Ajnp23 and Amp23-derived peptides, **AA.** Ajn25 and Arn25. **Abbreviations for post-translational modifications:** pQ, pyroglutamate; a, amide. Species abbreviations: *Apostichopus japonicus* (Ajap); *Strongylocentrotus purpuratus* (Spur); *Asterias rubens* (Arub); *Ophionotus victoriae* (Ovic); *Saccoglossus kowalevskii* (Skow); *Branchiostoma floridae* (Bflo); *Ciona intestinalis* (Cint); *Danio rerio* (Drer); *Gavialis gangeticus* (Ggan); *Petromyzon marinus* (Pmar); *Takifugu rubripes* (Trub); *Homo sapiens* (Hsap); *Alvinella pompejana* (Apom); *Aplysia californica* (Acal); *Lottia gigantea* (Lgig); *Capitella teleta* (Ctel); *Daphnia pulex* (Dpul); *Dendroctonus ponderosae* (Dpon); *Drosophila melanogaster* (Dmel); *Drosophila virilis* (Dvir); *Hypsibius dujardini* (Hduj); *Ilyanasa obsoleta* (Iobs); *Lymnaea stagnalis* (Lsta); *Procambrus clarkia* (Pcla); *Tribolium castaneum* (Tcas); *Caenorhabditis elegans* (Cele).

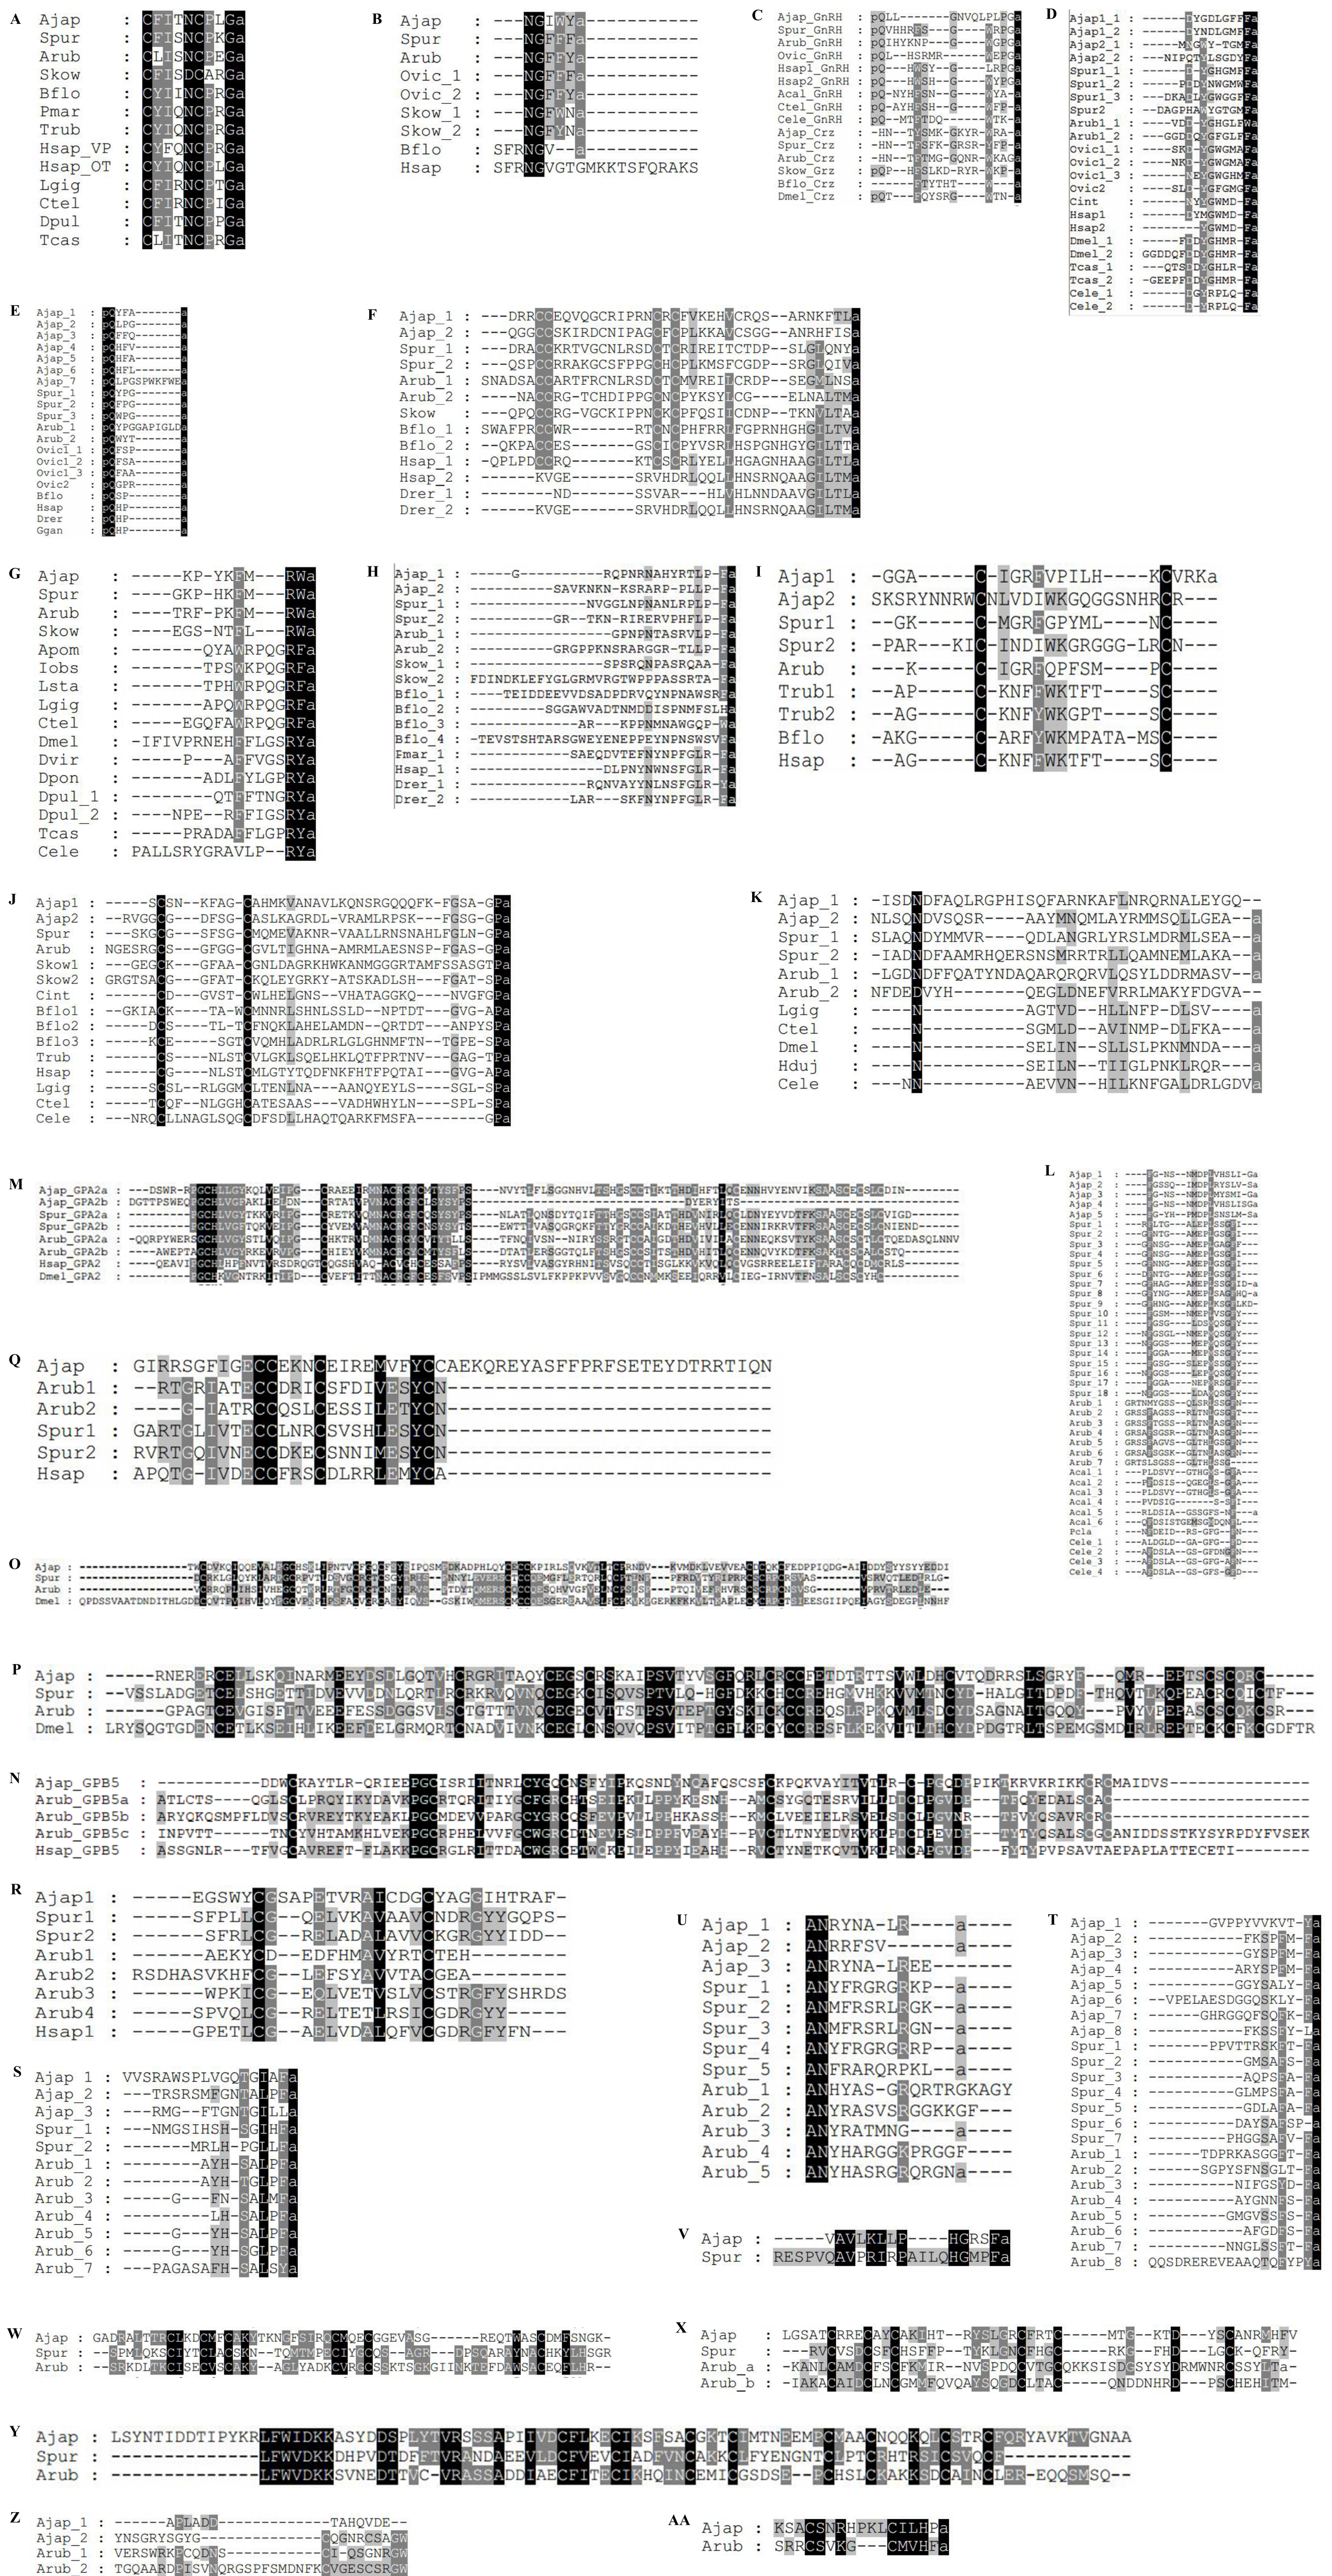

Supplement: 41598_2019_45271_MOESM1_ESM.pdf [file 41598_2019_45271_MOESM1_ESM.pdf]
