# Supplementary material for: Neuropeptide precursors and neuropeptides in the sea cucumber Apostichopus japonicus: a genomic, transcriptomic and proteomic analysis
Source: Springer Nature journal article supplement (doi:10.1038/s41598-019-45271-3), 2019-06-20

**Neuropeptide precursors and neuropeptides in the sea cucumber *Apostichopus japonicus*: a genomic, transcriptomic and proteomic analysis**

Muyan Chen<sup>1\*#</sup>, Alzbeta Talarovicova<sup>2#</sup>, Yingqiu Zheng<sup>1</sup>, Kenneth B. Storey<sup>3</sup>,  
Maurice R. Elphick<sup>2\*</sup>

1. *The Key Laboratory of Mariculture, Ministry of Education, Ocean University of China, Qingdao, PR China*
2. *School of Biological & Chemical Sciences, Queen Mary University of London, London E1 4NS, UK*
3. *Institute of Biochemistry, Carleton University, 1125 Colonel By Drive, Ottawa, ON, K1S 5B6, Canada*

**\* Correspondence:**

Prof. Muyan Chen: [chenmuyan@ouc.edu.cn](mailto:chenmuyan@ouc.edu.cn)

Prof. Maurice Elphick: [m.r.elphick@qmul.ac.uk](mailto:m.r.elphick@qmul.ac.uk)

# these authors contributed equally

**Supplementary Figure 2.** Mass spectra (MS/MS) of peptides detected in a digest of *A. japonicus* (streamer) muscle tissue that was reduced and alkylated without tryptic digestion. The b series of peptide fragment ions are shown in blue, the y series in red and odd-numbered b and y peptide fragment ions in red/blue. The amino acid sequence identified in the mass spectra is highlighted at the bottom of the figure, gl at the N-terminus represents pyroGlutamate (pGlu), ac at the C-terminus represents an acetyl group and Ox represents methionine oxidation. The horizontal axis represents m/z. **A.** Peptide pGlu-PGKPAKATL derived from A/TREP. **B.** Peptide GRQPNDSVAHTRFLPamide derived from AJ07P. **C.** Peptide YFQNSMRLVSRILGamide, FGRQSDVPLVYSLSamide and FQNSMDEPLATYDGRamide derived from AJ15G/MF0P. **D.** Peptide ANRYNALE derived from AJ45P. **E.** Peptide APLADDEAIQKDE derived from Aqg23. **F.** Peptide QGDHDEDEKLEELSL and GGRLLSYAGPRMFWLRLN derived from AqG19 precursor. **G.** Peptide SPTVGLASALLamide derived from AqWYQPS. **H.** Peptide APLAARPPSG derived from APLAARPPSG precursor. **I.** Peptide MPANPAPYFSRGTYYVPTREIN derived from A/MPANPAPYFSRGTYYVPTREIN precursor.

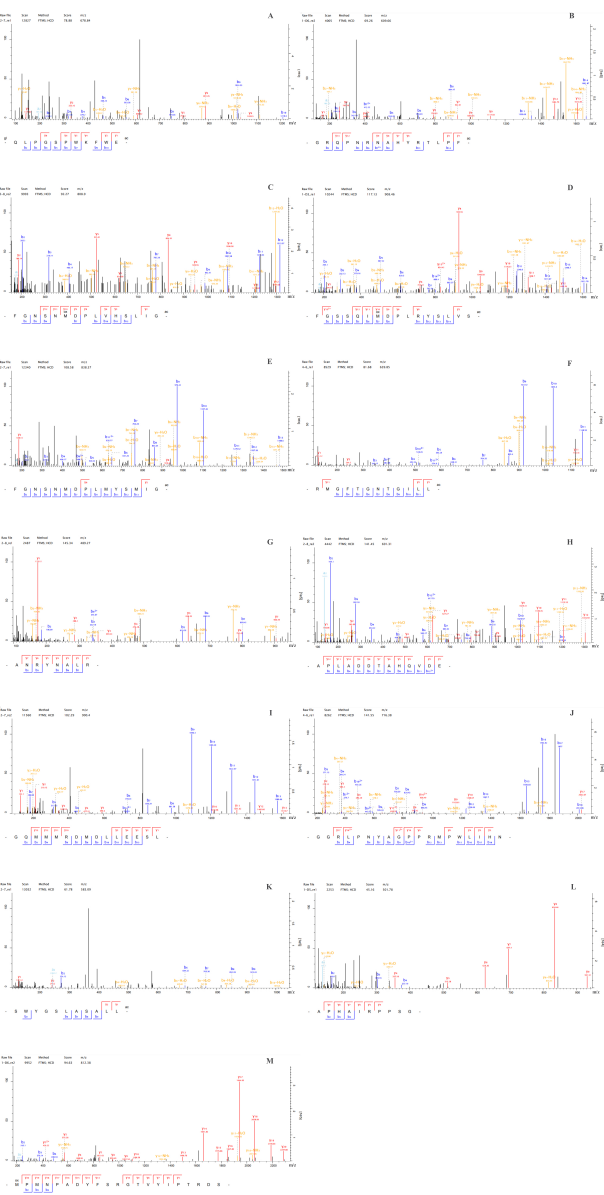

Supplement: 41598_2019_45271_MOESM2_ESM.pdf [file 41598_2019_45271_MOESM2_ESM.pdf]
